# Supplementary material for: Plasma Endocan as a Biomarker of Thrombotic Events in COVID-19 Patients
Source: MDPI journal article supplement (doi:10.3390/jcm11195560), 2022-09-22
Supplement: s1 [file s1]

**Table S1.** List of patients with demographics, disease severity, comorbidities and therapies.

| ID_Patient | Gender | Age (Years) | COVID-19 Severity | Thrombotic event (TE) (yes/no) | if yes, type of TE      | Cardio-vascular disease (yes/no) | Over-weight /obesity (yes/no) | Hypertension (yes/no) | Diabetes (yes/no) | Chronic respiratory failure (yes/no) | Systemic AI disease (yes/no) | antiviral treatment (yes/no) | if yes, specify antiviral treatment | Immunomodulator treatment (yes/no) | if yes, specify immunomodulator treatment |
|------------|--------|-------------|-------------------|--------------------------------|-------------------------|----------------------------------|-------------------------------|-----------------------|-------------------|--------------------------------------|------------------------------|------------------------------|-------------------------------------|------------------------------------|-------------------------------------------|
| ID065      | Man    | 50          | stage 1           | yes                            | Thrombosis on material  | no                               | no                            | no                    | no                | no                                   | no                           | yes                          | Kaletra                             | no                                 |                                           |
| ID107      | Man    | 66          | stage 3           | yes                            | Jugular thrombosis      | yes                              | yes                           | yes                   | yes               | no                                   | no                           | yes                          | HCQ                                 | yes                                | Sarilumab                                 |
| ID113      | Man    | 50          | stage 3           | yes                            | Jugular thrombosis      | no                               | yes                           | no                    | no                | no                                   | no                           | no                           |                                     | no                                 |                                           |
| ID114      | Man    | 56.2        | stage 3           | yes                            | Deep veinous thrombosis | yes                              | yes                           | yes                   | no                | no                                   | no                           | yes                          | Kaletra                             | yes                                | Sarilumab                                 |
| ID126      | Man    | 37.3        | stage 3           | yes                            | Jugular thrombosis      | no                               | yes                           | no                    | no                | no                                   | no                           | yes                          | Remdesivir                          | no                                 |                                           |
| ID011      | Man    | 45          | stage 3           | yes                            | PE                      | yes                              | no                            | no                    | no                | no                                   | no                           | no                           |                                     | no                                 |                                           |
| ID015      | Woman  | 77          | stage 3           | yes                            | PE                      | no                               | no                            | no                    | no                | no                                   | no                           | no                           |                                     | no                                 |                                           |
| ID024      | Man    | 50.8        | stage 3           | yes                            | PE                      | yes                              | no                            | no                    | no                | no                                   | no                           | no                           |                                     | no                                 |                                           |
| ID026      | Man    | 52          | stage 3           | yes                            | PE                      | yes                              | yes                           | yes                   | no                | no                                   | no                           | no                           |                                     | no                                 |                                           |
| ID052      | Man    | 77.7        | stage 3           | yes                            | PE                      | no                               | no                            | no                    | no                | no                                   | no                           | yes                          | Remdesivir                          | no                                 |                                           |
| ID100      | Woman  | 26.8        | stage 3           | yes                            | PE                      | no                               | yes                           | yes                   | no                | no                                   | no                           | no                           |                                     | yes                                | Anakinra                                  |
| ID122      | Woman  | 61          | stage 2           | yes                            | PE                      | no                               | yes                           | no                    | yes               | no                                   | no                           | yes                          | Kaletra                             | yes                                | Sarilumab                                 |
| ID156      | Man    | 50          | stage 3           | yes                            | PE                      | no                               | yes                           | no                    | no                | no                                   | no                           | no                           |                                     | no                                 |                                           |
| ID160      | Man    | 60          | stage 1           | yes                            | PE                      | no                               | yes                           | no                    | no                | no                                   | no                           | no                           |                                     | no                                 |                                           |
| ID171      | Man    | 65          | stage 2           | yes                            | PE                      | yes                              | yes                           | yes                   | no                | no                                   | no                           | yes                          | Kaletra                             | no                                 |                                           |
| ID183      | Man    | 71.6        | stage 1           | yes                            | PE                      | no                               | no                            | no                    | no                | no                                   | no                           | yes                          | Kaletra                             | no                                 |                                           |
| ID005      | Man    | 50          | stage 0           | no                             |                         | no                               | no                            | no                    | no                | no                                   | no                           | no                           |                                     | no                                 |                                           |
| ID006      | Woman  | 55          | stage 3           | no                             |                         | yes                              | yes                           | yes                   | yes               | no                                   | no                           | no                           |                                     | no                                 |                                           |
| ID008      | Man    | 72          | stage 3           | no                             |                         | yes                              | yes                           | yes                   | no                | no                                   | no                           | no                           |                                     | no                                 |                                           |
| ID012      | Man    | 35          | stage 0           | no                             |                         | no                               | no                            | no                    | no                | no                                   | no                           | no                           |                                     | no                                 |                                           |
| ID018      | Woman  | 47.4        | stage 0           | no                             |                         | no                               | no                            | no                    | no                | no                                   | no                           | no                           |                                     | no                                 |                                           |
| ID020      | Woman  | 76.1        | stage 1           | no                             |                         | no                               | no                            | no                    | no                | no                                   | no                           | no                           |                                     | no                                 |                                           |
| ID021      | Man    | 62.5        | stage 3           | no                             |                         | yes                              | yes                           | yes                   | no                | no                                   | no                           | no                           |                                     | no                                 |                                           |

|       |       |      |         |    |     |     |     |     |     |     |     |     |     |                             |
|-------|-------|------|---------|----|-----|-----|-----|-----|-----|-----|-----|-----|-----|-----------------------------|
| ID028 | Woman | 42.7 | stage 0 | no | no  | no  | no  | no  | no  | no  | no  | no  | no  |                             |
| ID029 | Man   | 55.3 | stage 0 | no | no  | yes | no  |                             |
| ID033 | Woman | 75.2 | stage 1 | no | yes | yes | yes | yes | no  | no  | no  | no  | no  |                             |
| ID034 | Woman | 46   | stage 0 | no | no  | no  | no  | no  | no  | no  | no  | no  | no  |                             |
| ID039 | Woman | 27.3 | stage 0 | no | no  | no  | no  | no  | no  | no  | no  | no  | no  |                             |
| ID040 | Woman | 84   | stage 3 | no | yes | no  | no  | yes | yes | yes | yes | yes | 3   | HCQ                         |
| ID043 | Man   | 69.1 | stage 3 | no | no  | yes | no  |                             |
| ID044 | Woman | 53.3 | stage 2 | no | no  | no  | no  | no  | no  | no  | no  | no  | yes | Anakinra                    |
| ID045 | Man   | 43.4 | stage 0 | no | no  | no  | no  | no  | no  | no  | no  | no  | no  |                             |
| ID046 | Woman | 69   | stage 1 | no | yes | yes | no  |                             |
| ID049 | Man   | 66   | stage 2 | no | yes | no  | no  | yes | no  | no  | no  | no  | yes | Sarilumab                   |
| ID051 | Man   | 54   | stage 3 | no | no  | yes | no  |                             |
| ID054 | Man   | 94.4 | stage 0 | no | yes | no  |                             |
| ID057 | Man   | 77.5 | stage 1 | no | yes | yes | yes | yes | no  | no  | yes | yes | no  | Kaletra                     |
| ID058 | Man   | 40.6 | stage 1 | no | no  | yes | no  | no  | no  | no  | no  | no  | yes | Sarilumab                   |
| ID059 | Man   | 45   | stage 3 | no | no  | yes | no  | no  | no  | no  | yes | yes | no  | HCQ                         |
| ID060 | Woman | 57.9 | stage 0 | no | no  | no  | no  | no  | no  | no  | no  | no  | no  |                             |
| ID064 | Woman | 69.4 | stage 2 | no | no  | no  | no  | no  | yes | no  | no  | no  | no  |                             |
| ID069 | Woman | 80.3 | stage 1 | no | yes | no  | yes | yes | no  | no  | no  | no  | no  |                             |
| ID070 | Woman | 80.3 | stage 1 | no | yes | no  | yes | yes | no  | no  | no  | no  | no  |                             |
| ID071 | Man   | 76.3 | stage 2 | no | yes | no  | yes | no  | no  | no  | yes | yes | no  | Kaletra                     |
| ID072 | Man   | 64.8 | stage 1 | no | no  | no  | no  | no  | no  | no  | no  | no  | no  |                             |
| ID073 | Woman | 62   | stage 1 | no | yes | no  | no  | no  | no  | yes | yes | yes | yes | Kaletra                     |
| ID077 | Woman | 21   | stage 0 | no | no  | no  | no  | no  | no  | no  | no  | no  | no  | IFN                         |
| ID085 | Man   | 34   | stage 1 | no | no  | no  | no  | no  | no  | no  | no  | no  | no  |                             |
| ID087 | Man   | 64.2 | stage 3 | no | no  | yes | no  | no  | no  | no  | yes | yes | no  | HCQ +<br>azithromy-<br>cine |
| ID089 | Woman | 70   | stage 1 | no | no  | no  | no  | no  | no  | yes | yes | yes | no  | Kaletra                     |
| ID090 | Man   | 74.2 | stage 1 | no | yes | no  | yes | no  | yes | no  | no  | no  | no  |                             |
| ID091 | Woman | 82   | stage 3 | no | yes | no  | yes | no  | no  | no  | yes | yes | no  | Kaletra                     |
| ID095 | Woman | 21.3 | stage 0 | no | no  | no  | no  | no  | no  | no  | no  | no  | no  |                             |
| ID097 | Woman | 58   | stage 2 | no | no  | yes | no  | yes | no  | no  | yes | yes | no  | HCQ +<br>azithromy-<br>cine |
| ID103 | Woman | 33.4 | stage 0 | no | no  | no  | no  | no  | no  | no  | no  | no  | no  |                             |
| ID106 | Woman | 88.2 | stage 2 | no | yes | no  | no  | no  | no  | no  | yes | yes | no  | Kaletra                     |
| ID110 | Man   | 61.9 | stage 3 | no | no  | yes | no  | yes | no  | no  | yes | yes | yes | Remdesivir                  |
|       |       |      |         |    |     |     |     |     |     |     |     |     | yes | Anakinra                    |

|       |       |      |         |    |     |     |     |     |     |     |         |         |           |           |
|-------|-------|------|---------|----|-----|-----|-----|-----|-----|-----|---------|---------|-----------|-----------|
| ID112 | Woman | 52   | stage 2 | no | no  | yes | no  | no  | no  | no  | yes     | Kaletra | no        |           |
| ID121 | Woman | 64.3 | stage 2 | no | yes | yes | yes | yes | no  | no  | no      |         | no        |           |
| ID125 | Man   | 57   | stage 2 | no | no  | no  | no  | no  | no  | yes | Kaletra | yes     | Sarilumab |           |
| ID128 | Man   | 73   | stage 3 | no | yes | yes | yes | yes | no  | no  | no      |         | no        |           |
| ID129 | Man   | 77.2 | stage 0 | no | yes | yes | yes | no  | no  | no  | no      |         | no        |           |
| ID130 | Woman | 82   | stage 2 | no | no  | no  | no  | no  | no  | yes | Kaletra | no      |           |           |
| ID134 | Woman | 66.1 | stage 2 | no | yes | yes | yes | no  | no  | no  | no      |         | no        |           |
| ID135 | Woman | 37.3 | stage 0 | no | no  | no  | no  | no  | no  | no  | no      |         | no        |           |
| ID142 | Man   | 82.2 | stage 3 | no | yes | no  | yes | no  | yes | no  | no      |         | yes       | Anakinra  |
| ID144 | Man   | 50   | stage 1 | no | no  | no  | no  | no  | no  | no  | no      |         | yes       | Sarilumab |
| ID145 | Woman | 64.3 | stage 3 | no | no  | yes | no  | yes | no  | no  | no      |         | no        |           |
| ID147 | Man   | 62.4 | stage 1 | no | yes | yes | yes | no  | no  | no  | yes     | Kaletra | no        |           |
| ID158 | Man   | 38   | stage 1 | no | no  | no  | no  | no  | no  | no  | no      |         | no        |           |
| ID161 | Man   | 72.2 | stage 2 | no | yes | yes | yes | no  | no  | no  | no      |         | no        |           |
| ID163 | Man   | 49   | stage 1 | no | no  | no  | no  | no  | no  | no  | no      |         | no        |           |
| ID166 | Man   | 73   | stage 1 | no | yes | no  | yes | yes | no  | no  | no      |         | no        |           |
| ID170 | Woman | 57.2 | stage 0 | no | no  | no  | no  | no  | no  | no  | no      |         | no        |           |
| ID172 | Man   | 62   | stage 2 | no | yes | no  | yes | yes | no  | no  | no      |         | no        |           |
| ID175 | Woman | 60   | stage 1 | no | yes | yes | no  | yes | no  | no  | yes     | Kaletra | no        |           |
| ID180 | Woman | 31.5 | stage 0 | no | no  | no  | no  | no  | no  | no  | no      |         | no        |           |
| ID185 | Woman | 32   | stage 0 | no | no  | no  | no  | no  | no  | no  | no      |         | no        |           |
| ID188 | Woman | 45   | stage 2 | no | no  | yes | no  | no  | no  | no  | yes     | Kaletra | yes       | Sarilumab |
